# Supplementary material
Source: Springer Nature journal article supplement (https://www.springerprofessional.de/resource/supplementary/13638_2013_839_MOESM1_ESM.pdf/11898598)

Source node

Relay node 1

Relay node 2

Sink node

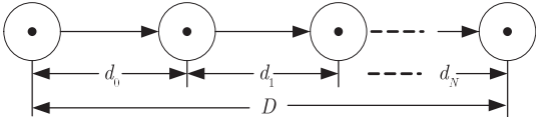

Supplement: MOESM1 [file 11898598]
